# Supplementary material for: The chloroplast genomes of Bryopsis plumosa and Tydemania expeditiones (Bryopsidales, Chlorophyta): compact genomes and genes of bacterial origin
Source: PubMed Central journal article supplement (PMC4487195; doi:10.1186/s12864-015-1418-3), 2015-03-17
Supplement: 12864_2015_1418_MOESM5_ESM.pdf [file 12864_2015_1418_MOESM5_ESM.pdf]

**Additional file 5. Putative RNA secondary structure of *atpA* type II intron of *Bryopsis plumosa*.**

The RNA structure was modeled according to Michel et al. [1]. Exon sequences are shown in lowercase letters. Roman numerals specify the six major structural domains. EBS and IBS are exon- and intron-binding sites, respectively. The asterisk (\*) indicates the site of lariat formation (bulged A in helix VI). Some conserved nucleotides found in type II introns such as the conserved AGC and bulged AC in helix V, the GUGUG motif at the 5'-end, and the AC motif at the 3'-end of the intron are highlighted.

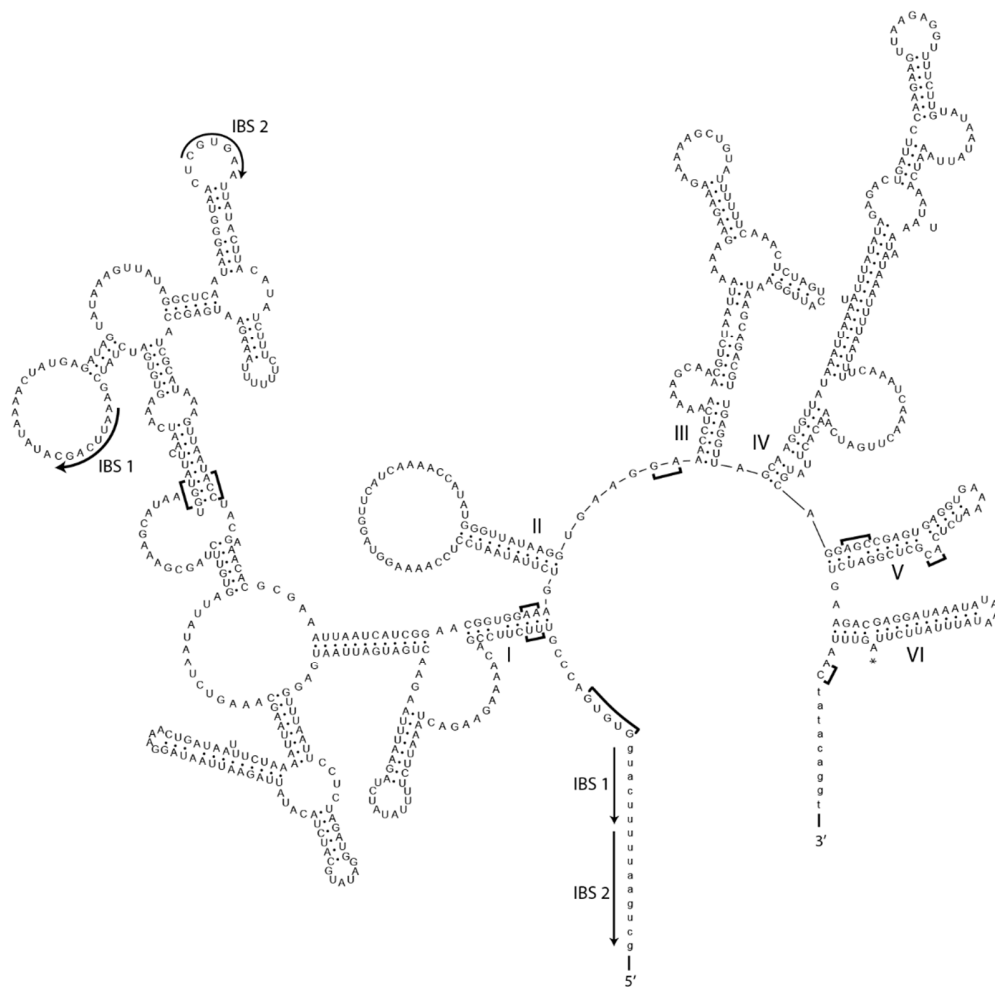

1. Michel F, Umesono K, Ozeki H: **Comparative and functional anatomy of group II catalytic introns - a review.** *Gene* 1989, **82**(1):5-30.
