# Supplementary material for: The chloroplast genomes of Bryopsis plumosa and Tydemania expeditiones (Bryopsidales, Chlorophyta): compact genomes and genes of bacterial origin
Source: PubMed Central journal article supplement (PMC4487195; doi:10.1186/s12864-015-1418-3), 2015-03-17
Supplement: 12864_2015_1418_MOESM6_ESM.pdf [file 12864_2015_1418_MOESM6_ESM.pdf]

**Additional file 6.** Taxon sampling for the 79-gene and 50-gene datasets used in the phylogenomic analyses.

| Species                               | 79-gene dataset | 50-gene dataset | Genbank accession number(s)                                                                                                                                                        |
|---------------------------------------|-----------------|-----------------|------------------------------------------------------------------------------------------------------------------------------------------------------------------------------------|
| <i>Acetabularia acetabulum</i>        |                 | ✓               | HG518426-HG518474                                                                                                                                                                  |
| <i>Acutodesmus obliquus</i>           | ✓               | ✓               | NC_008101                                                                                                                                                                          |
| <i>Botryococcus braunii</i>           | ✓               | ✓               | KM462884                                                                                                                                                                           |
| <i>Bryopsis hypnoides</i>             | ✓               | ✓               | NC_013359                                                                                                                                                                          |
| <i>Bryopsis plumosa</i>               | ✓               | ✓               | LN810504                                                                                                                                                                           |
| <i>Cephaleuros parasiticus</i>        |                 | ✓               | KM464687, KM464693, KM464698, KM464707, KM464711, KM464715, KM491797, KM491799, KM491808, KM491813, KM491819, KM491823, KM491825, KM491828, KM491837, KM491848, KM504519           |
| <i>Chlamydomonas reinhardtii</i>      | ✓               | ✓               | NC_005353                                                                                                                                                                          |
| <i>Chlorella vulgaris</i>             | ✓               | ✓               | NC_001865                                                                                                                                                                          |
| <i>Coccomyxa subellipsoidea</i> C-169 | ✓               | ✓               | NC_015084                                                                                                                                                                          |
| <i>Dunaliella salina</i>              | ✓               | ✓               | NC_016732                                                                                                                                                                          |
| <i>Elliptochloris bilobata</i>        | ✓               | ✓               | KM462887                                                                                                                                                                           |
| <i>Floydiella terrestris</i>          | ✓               | ✓               | NC_014346                                                                                                                                                                          |
| <i>Geminella minor</i>                | ✓               | ✓               | KM462883                                                                                                                                                                           |
| <i>Halimeda cylindracea</i>           |                 | ✓               | KM820107-KM820166                                                                                                                                                                  |
| <i>Koliella longiseta</i>             | ✓               | ✓               | KM462868                                                                                                                                                                           |
| <i>Leptosira terrestris</i>           | ✓               | ✓               | NC_009681                                                                                                                                                                          |
| <i>Lobosphaera incisa</i>             | ✓               | ✓               | KM462871                                                                                                                                                                           |
| <i>Marsupiomonas</i> sp. NIES 1824    | ✓               | ✓               | KM462870                                                                                                                                                                           |
| <i>Marvania geminata</i>              | ✓               | ✓               | KM462888                                                                                                                                                                           |
| <i>Microthamnion kuetzingianum</i>    | ✓               | ✓               | KM462876                                                                                                                                                                           |
| <i>Monomastix</i> sp. OKE-1           | ✓               | ✓               | NC_012101                                                                                                                                                                          |
| <i>Myrmecia israelensis</i>           | ✓               |                 | KM462861                                                                                                                                                                           |
| <i>Neocystis brevis</i>               | ✓               | ✓               | KM462873                                                                                                                                                                           |
| <i>Nephroselmis astigmatica</i>       | ✓               | ✓               | KJ746600                                                                                                                                                                           |
| <i>Nephroselmis olivacea</i>          | ✓               | ✓               | NC_000927                                                                                                                                                                          |
| <i>Oedogonium cardiacum</i>           | ✓               | ✓               | NC_011031                                                                                                                                                                          |
| <i>Oltmannsiellopsis viridis</i>      | ✓               | ✓               | NC_008099                                                                                                                                                                          |
| <i>Oocystis solitaria</i>             | ✓               | ✓               | FJ968739                                                                                                                                                                           |
| <i>Ostreococcus tauri</i>             | ✓               | ✓               | NC_008289                                                                                                                                                                          |
| <i>Parachlorella kessleri</i>         | ✓               | ✓               | NC_012978                                                                                                                                                                          |
| <i>Pedinomonas minor</i>              | ✓               | ✓               | NC_016733                                                                                                                                                                          |
| <i>Pedinomonas tuberculata</i>        | ✓               | ✓               | KM462867                                                                                                                                                                           |
| <i>Picocystis salinarum</i>           | ✓               | ✓               | KJ746599                                                                                                                                                                           |
| <i>Prasinococcus</i> sp. CCMP1194     | ✓               | ✓               | KJ746597                                                                                                                                                                           |
| <i>Prasinoderma coloniale</i>         | ✓               | ✓               | NC_024817                                                                                                                                                                          |
| <i>Prasinophyceae</i> sp. CCMP1205    | ✓               | ✓               | KJ746601                                                                                                                                                                           |
| <i>Prasinophyceae</i> sp. MBIC10622   | ✓               | ✓               | KJ746602                                                                                                                                                                           |
| <i>Prasiolopsis</i> sp. SAG 84.81     | ✓               | ✓               | KM462862                                                                                                                                                                           |
| <i>Pseudendoclonium akinetum</i>      | ✓               | ✓               | NC_008114                                                                                                                                                                          |
| <i>Pseudochloris wilhelmii</i>        | ✓               | ✓               | KM462886                                                                                                                                                                           |
| <i>Pycnococcus provasolii</i>         | ✓               | ✓               | NC_012097                                                                                                                                                                          |
| <i>Pyramimonas parkeae</i>            | ✓               | ✓               | NC_012099                                                                                                                                                                          |
| <i>Schizomeris leibleinii</i>         |                 | ✓               | NC_015645                                                                                                                                                                          |
| <i>Stigeoclonium helveticum</i>       | ✓               | ✓               | NC_008372                                                                                                                                                                          |
| <i>Tetraselmis</i> spp                |                 | ✓               | AB561008-AB561081, DQ173248, DQ173249, DQ227304, HF931099                                                                                                                          |
| <i>Trebouxia aggregata</i>            |                 | ✓               | EU123963-EU124002                                                                                                                                                                  |
| <i>Trentepohlia annulata</i>          |                 | ✓               | KM464689, KM464692, KM464697, KM464705, KM464706, KM464712, KM464717, KM491796, KM491802, KM491811, KM491820, KM491824, KM491826, KM491831, KM491834, KM491839, KM491841, KM491845 |
| <i>Tydemanina expeditiones</i>        | ✓               | ✓               | LN810505                                                                                                                                                                           |
| <i>Ulva</i> sp. UNA00071828           | ✓               | ✓               | KP720616                                                                                                                                                                           |
| <i>Volvox carteri</i>                 |                 | ✓               | GU084820                                                                                                                                                                           |
| <i>Watanabea reniformis</i>           | ✓               | ✓               | KM462863                                                                                                                                                                           |
| <i>Xylochloris irregularis</i>        | ✓               | ✓               | KM462872                                                                                                                                                                           |
