# Supplementary material for: The chloroplast genomes of Bryopsis plumosa and Tydemania expeditiones (Bryopsidales, Chlorophyta): compact genomes and genes of bacterial origin
Source: BMC Genomics. 2015 Mar 17;16(1):204. doi: 10.1186/s12864-015-1418-3 (PMC4487195; doi:10.1186/s12864-015-1418-3)

Read coverage is indicated by the blue area plot; protein-coding genes are indicated in yellow, rRNA genes in red, and tRNA genes in purple.

Genomic tracks for *B. pumilus* showing coverage, read alignments, and gene annotations across 25 genes. The tracks are organized into 13 pairs, each corresponding to a gene. Each pair includes a coverage plot (top) and a read alignment track (bottom). Gene names are listed on the left of each pair. The x-axis represents genomic coordinates in base pairs, ranging from 0 to 5,300 for the first gene and up to 108,859 for the last. The y-axis for each pair shows the read depth (coverage). The read alignment tracks show individual sequencing reads with their corresponding quality scores. Gene annotations are shown as colored bars above the alignment tracks, with labels for each gene: *B. pumilus*, *B. pumilus*. The tracks are color-coded by gene: blue for *B. pumilus*, red for *B. pumilus*, green for *B. pumilus*, yellow for *B. pumilus*, orange for *B. pumilus*, purple for *B. pumilus*, pink for *B. pumilus*, brown for *B. pumilus*, grey for *B. pumilus*, light blue for *B. pumilus*, light green for *B. pumilus*, light orange for *B. pumilus*, light purple for *B. pumilus*, light pink for *B. pumilus*, light brown for *B. pumilus*, light grey for *B. pumilus*, light blue-grey for *B. pumilus*, light green-grey for *B. pumilus*, light orange-grey for *B. pumilus*, light purple-grey for *B. pumilus*, light pink-grey for *B. pumilus*, light brown-grey for *B. pumilus*, light grey-blue for *B. pumilus*, light grey-green for *B. pumilus*, light grey-orange for *B. pumilus*, light grey-purple for *B. pumilus*, light grey-pink for *B. pumilus*, light grey-brown for *B. pumilus*.

# Tydemania expeditiones

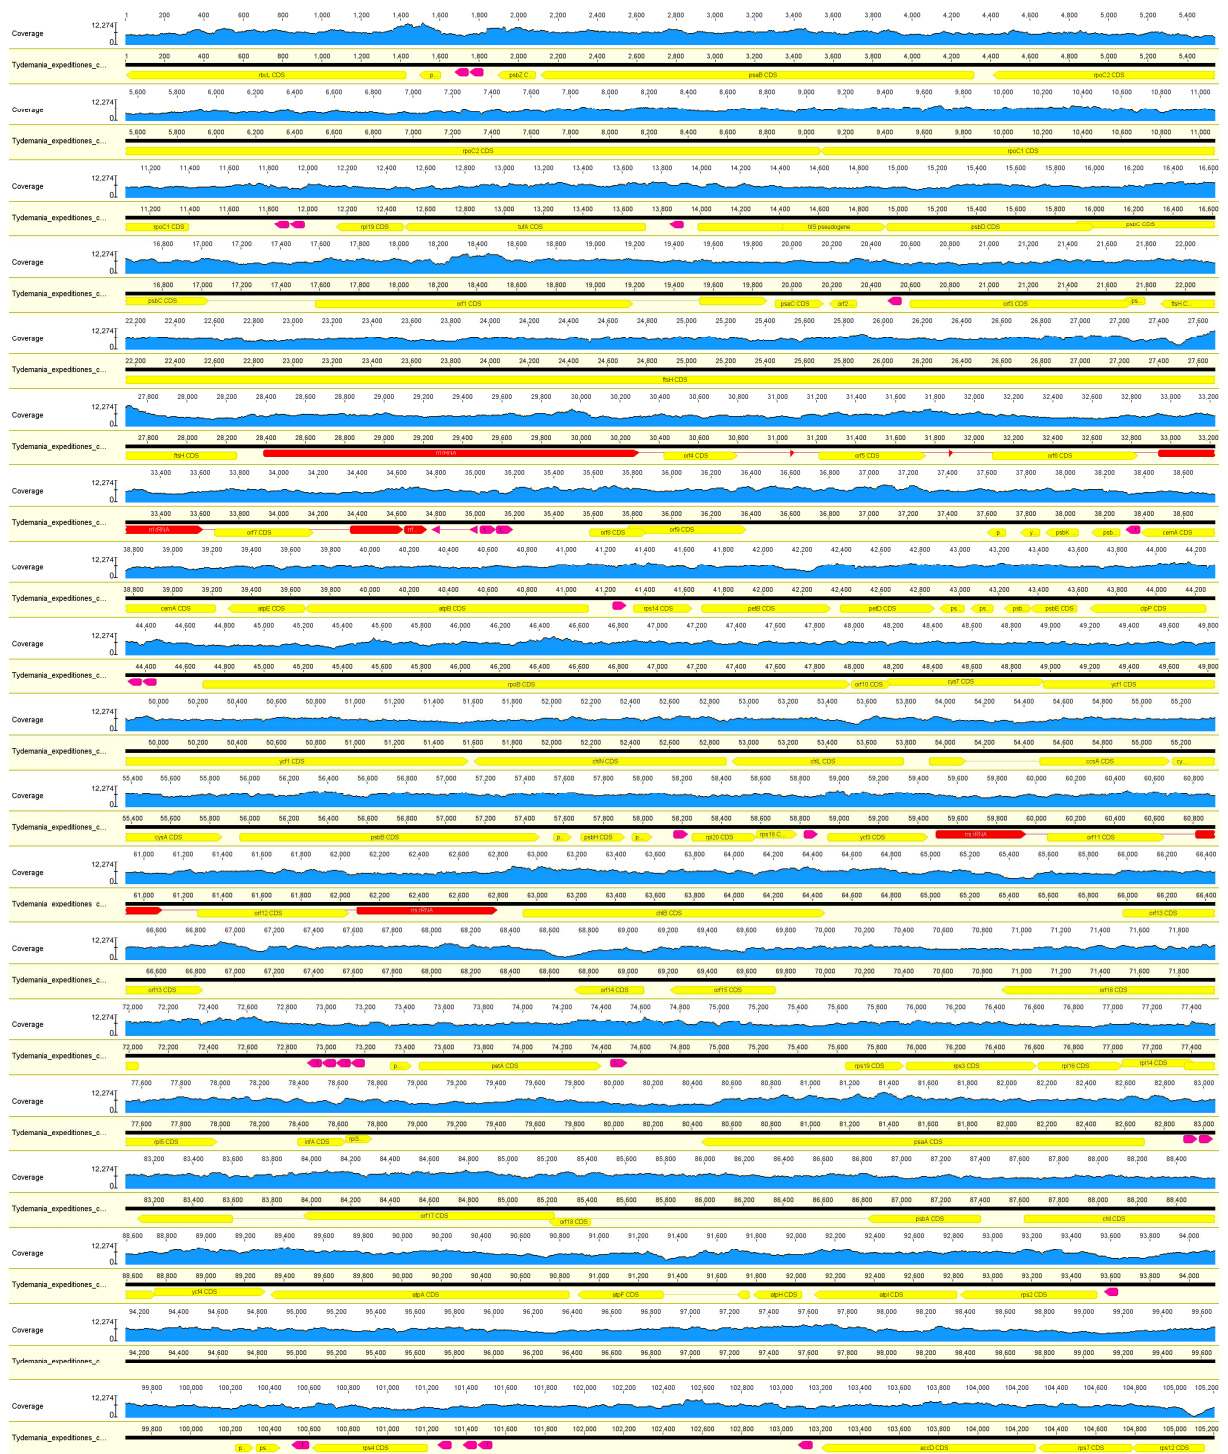

Supplement: Additional file 1: — Read coverage graphs of the cpDNAs of Bryopsis plumosa and Tydemania expeditiones. [file 12864_2015_1418_MOESM1_ESM.pdf]
